# Supplementary material
Source: Springer Nature journal article supplement (https://www.springermedizin.de/resource/supplementary/12985_2014_2401_MOESM1_ESM.pdf/9607034)

Cytoplasmic domain

3a

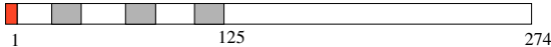

Cyto-3a

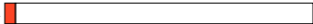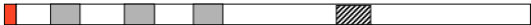

PYNSVTDTIVVTEGDG

↓ ↓  
ANSG

$\Delta YXX\Phi$   
 $\Delta EXD$

↓ ↓  
AGA

Supplement: MOESM1 [file 9607034]
